# Supplementary figures and images for: The Snakeskin Gourami (Trichopodus pectoralis) Tends to Exhibit XX/XY Sex Determination
Source: MDPI journal article supplement (doi:10.3390/fishes6040043), 2021-09-23

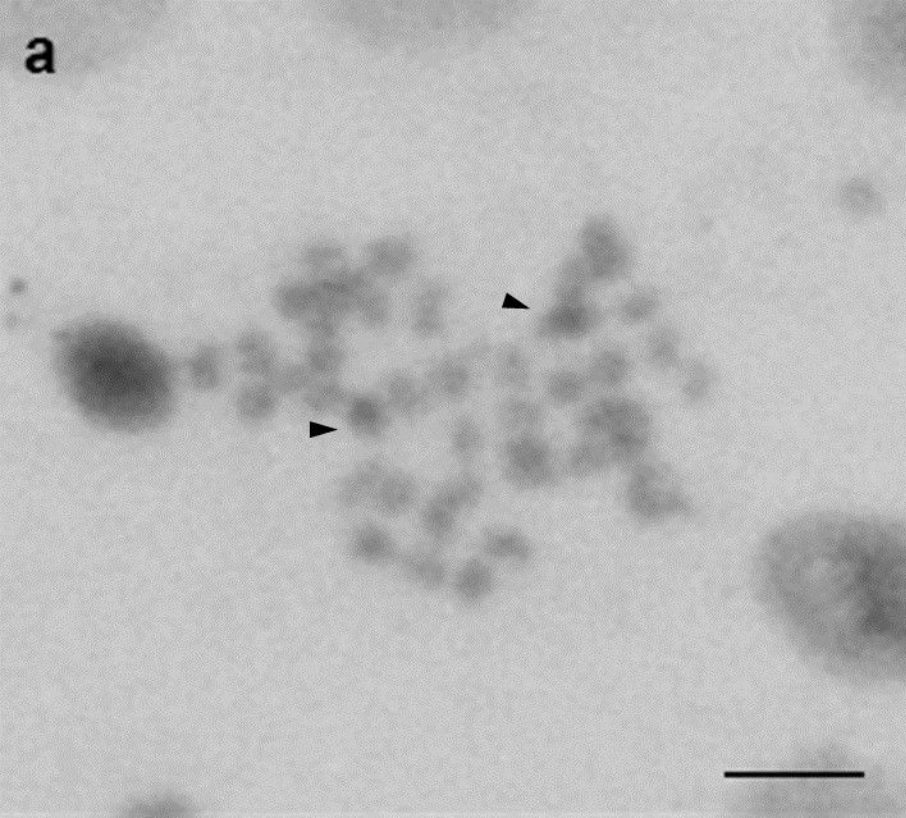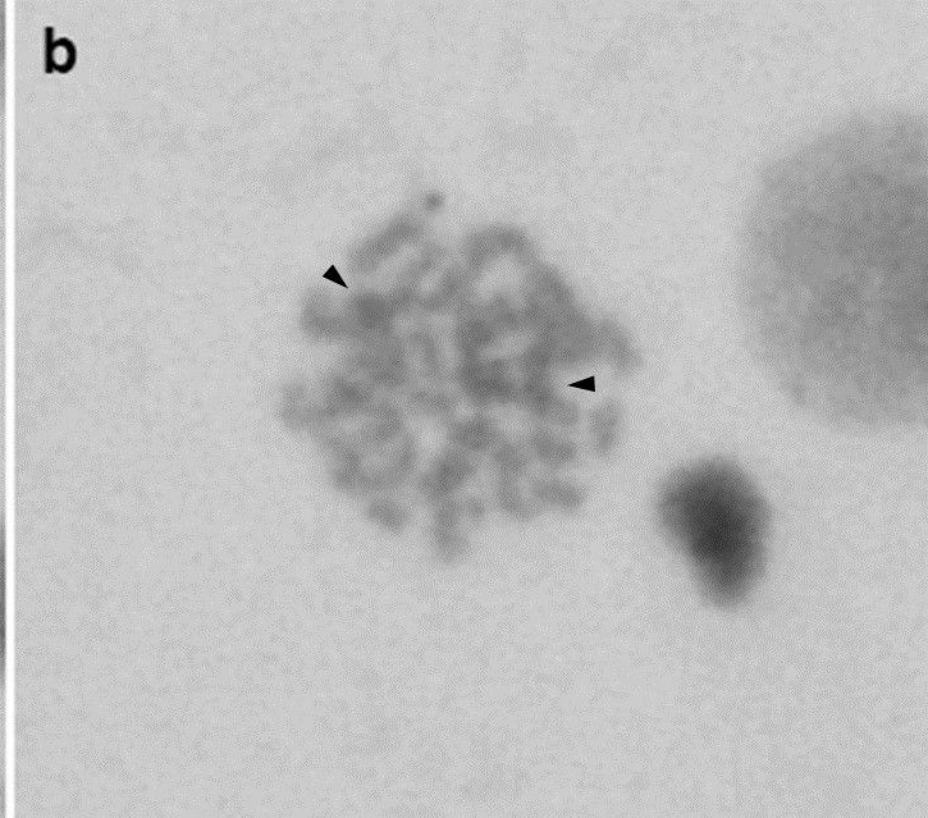

Supplement: s1 [file s1]

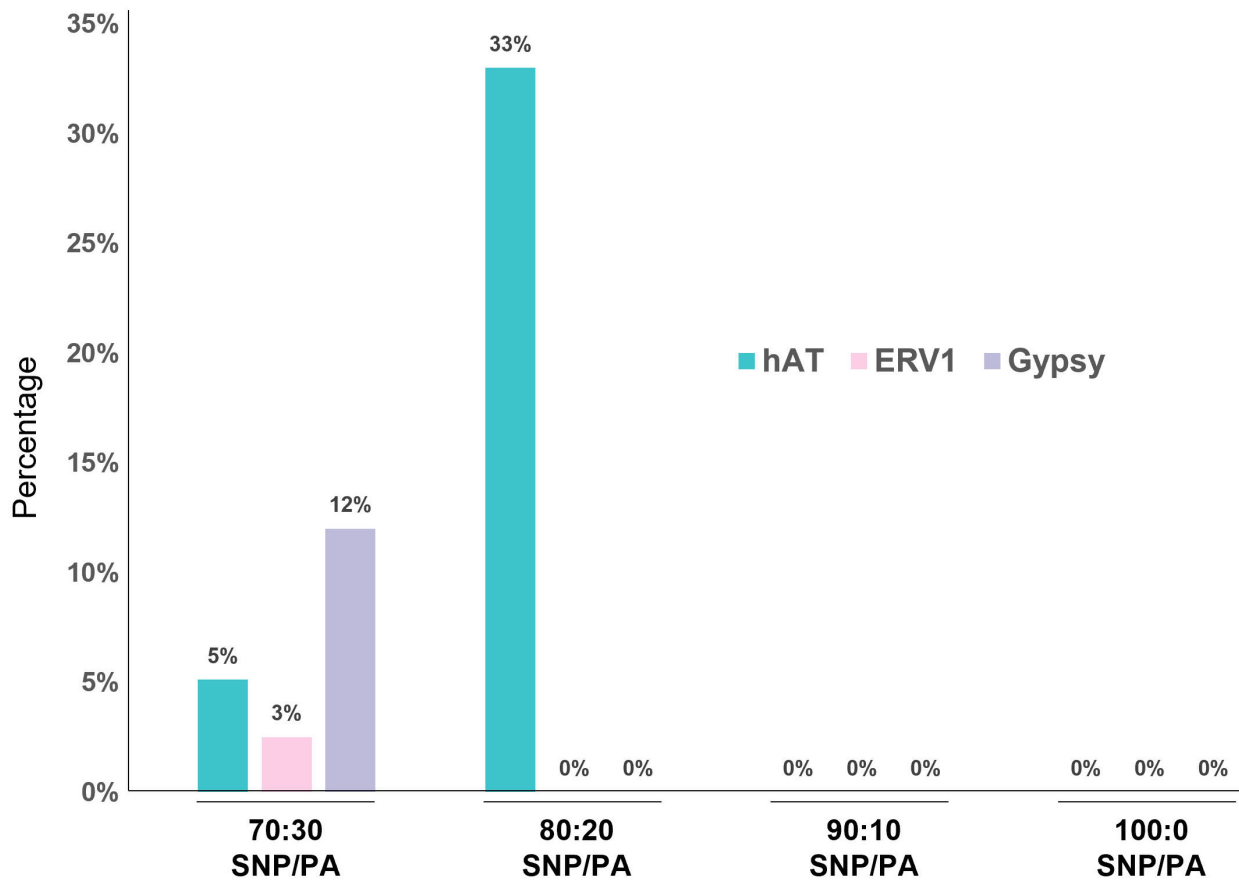

Supplement: s1 [file s1]

**a**

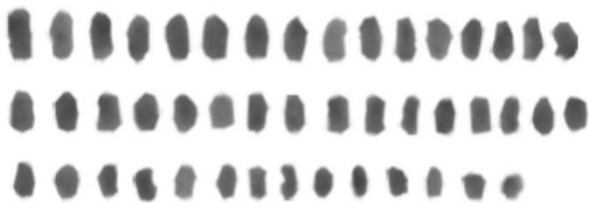

**b**

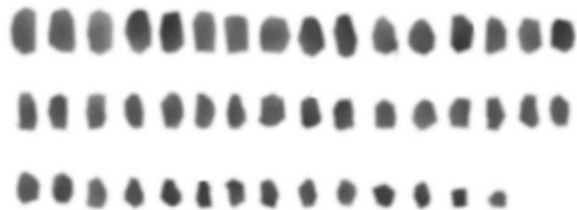

Supplement: s1 [file s1]
